# Supplementary material for: Effects of vanadium pentoxide with different crystallinities on lithium ion storage performance
Source: Royal Society of Chemistry journal article supplement (doi:10.1039/c9ce01358j), 2019-01-01
Supplement: c9ce01358j1.pdf [file c9ce01358j1.pdf]

## Supplementary Materials

### Effects of Vanadium Pentoxide with Different Crystallinity on Lithium Ion Storage Performance

Lü-qiang Yu <sup>a,b</sup>, Shi-Xi Zhao <sup>a,\*</sup>, Xia Wu <sup>a,b</sup>, Qi-Long Wu <sup>a,b</sup>, Jing-Wei Li <sup>a,b</sup>, En-Lai Zhao <sup>a,b</sup>

<sup>a</sup> Tsinghua Shenzhen International Graduate School, Tsinghua University, Shenzhen, 518055, China

<sup>b</sup> School of Materials Science and Engineering, Tsinghua University, Beijing, 100084, China

\* Corresponding author:

E-mail address: zhaosx@sz.tsinghua.edu.cn (S.X. Zhao).

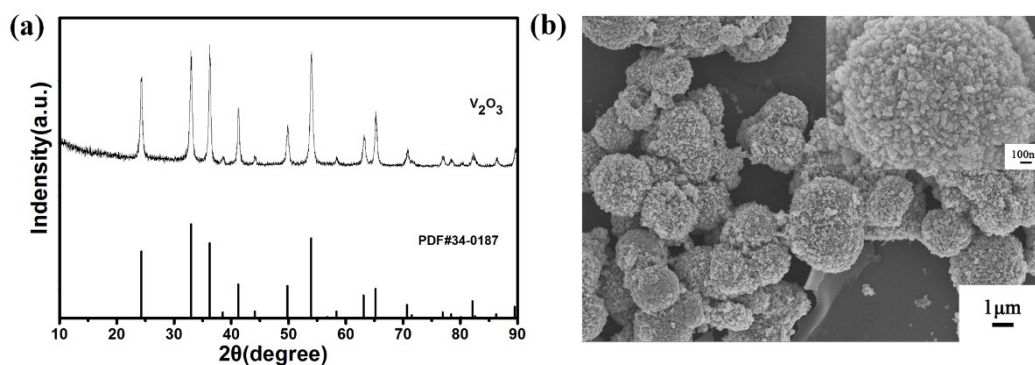

Fig. S1 XRD pattern and SEM image of the precursor.

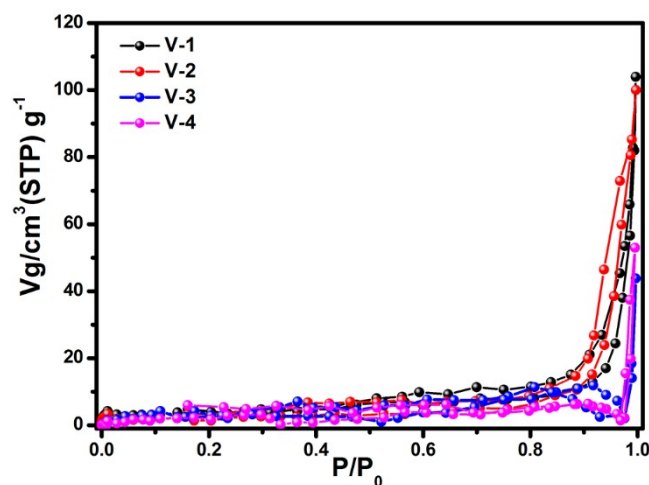

Fig. S2 Nitrogen adsorption-desorption isotherms of four samples.

Table S1. Specific surface area and pore diameters of four samples.

| Sample | $S_{\text{BET}}$ (m <sup>2</sup> /g) | Pore Volume (cm <sup>3</sup> /g) |
|--------|--------------------------------------|----------------------------------|
| V-1    | 6.79                                 | 1.56                             |
| V-2    | 6.70                                 | 1.54                             |
| V-3    | 0.62                                 | 0.14                             |
| V-4    | 0.54                                 | 0.12                             |

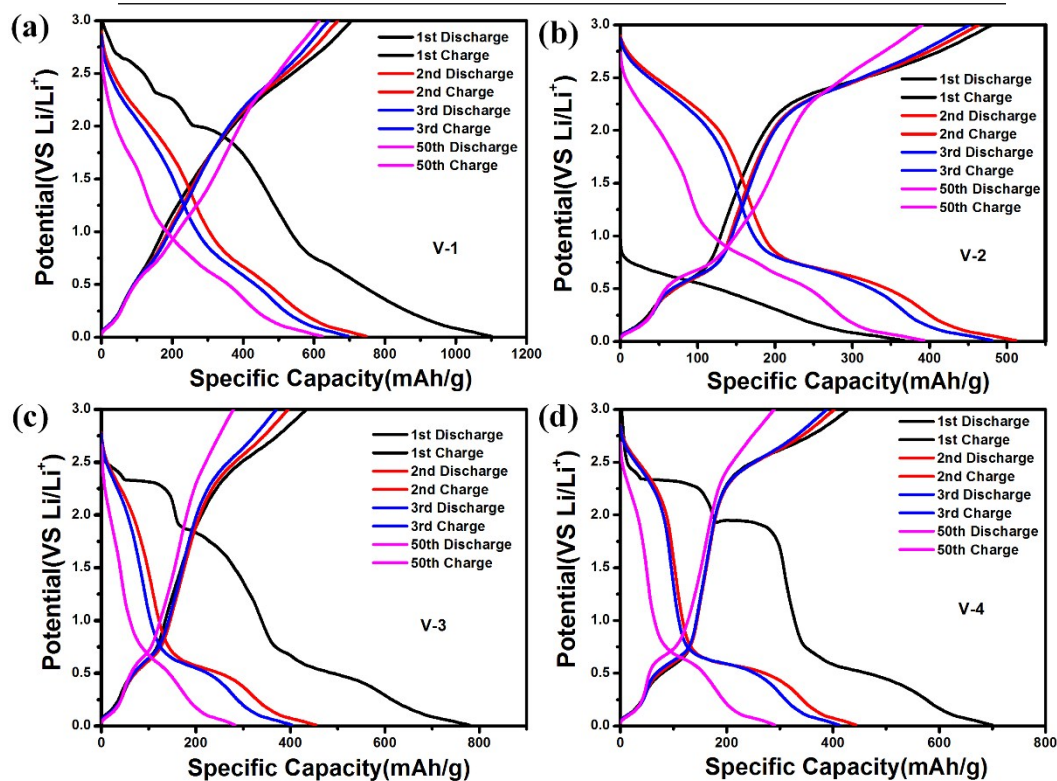

Fig. S3 Discharge-charge curves of V-1, V-2, V-3, and V-4 from 0.01 to 3 V at a current density of 100 mA·g<sup>-1</sup>.

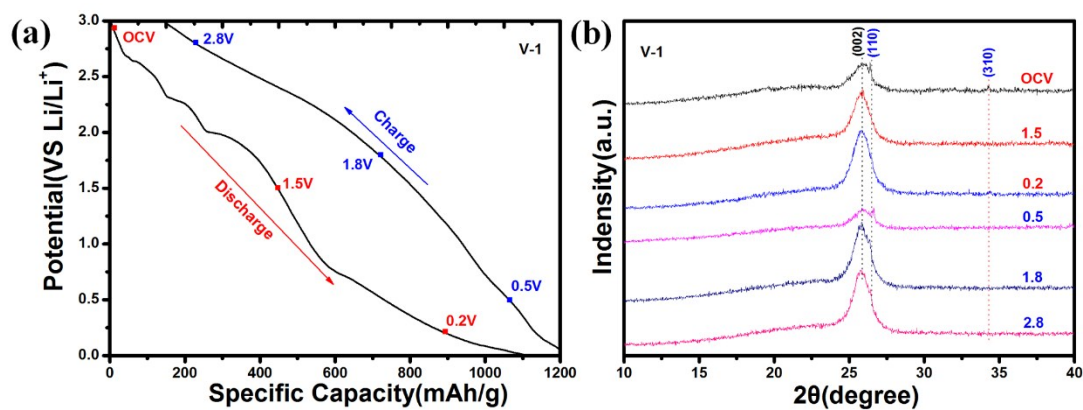

Fig. S4 XRD patterns of V-1 material during the initial cycle process at 100 mA·g<sup>-1</sup>.
